# Supplementary material
Source: Springer Nature journal article supplement (https://www.springerprofessional.de/resource/supplementary/13688_2012_6_MOESM5_ESM.pdf/11893970)

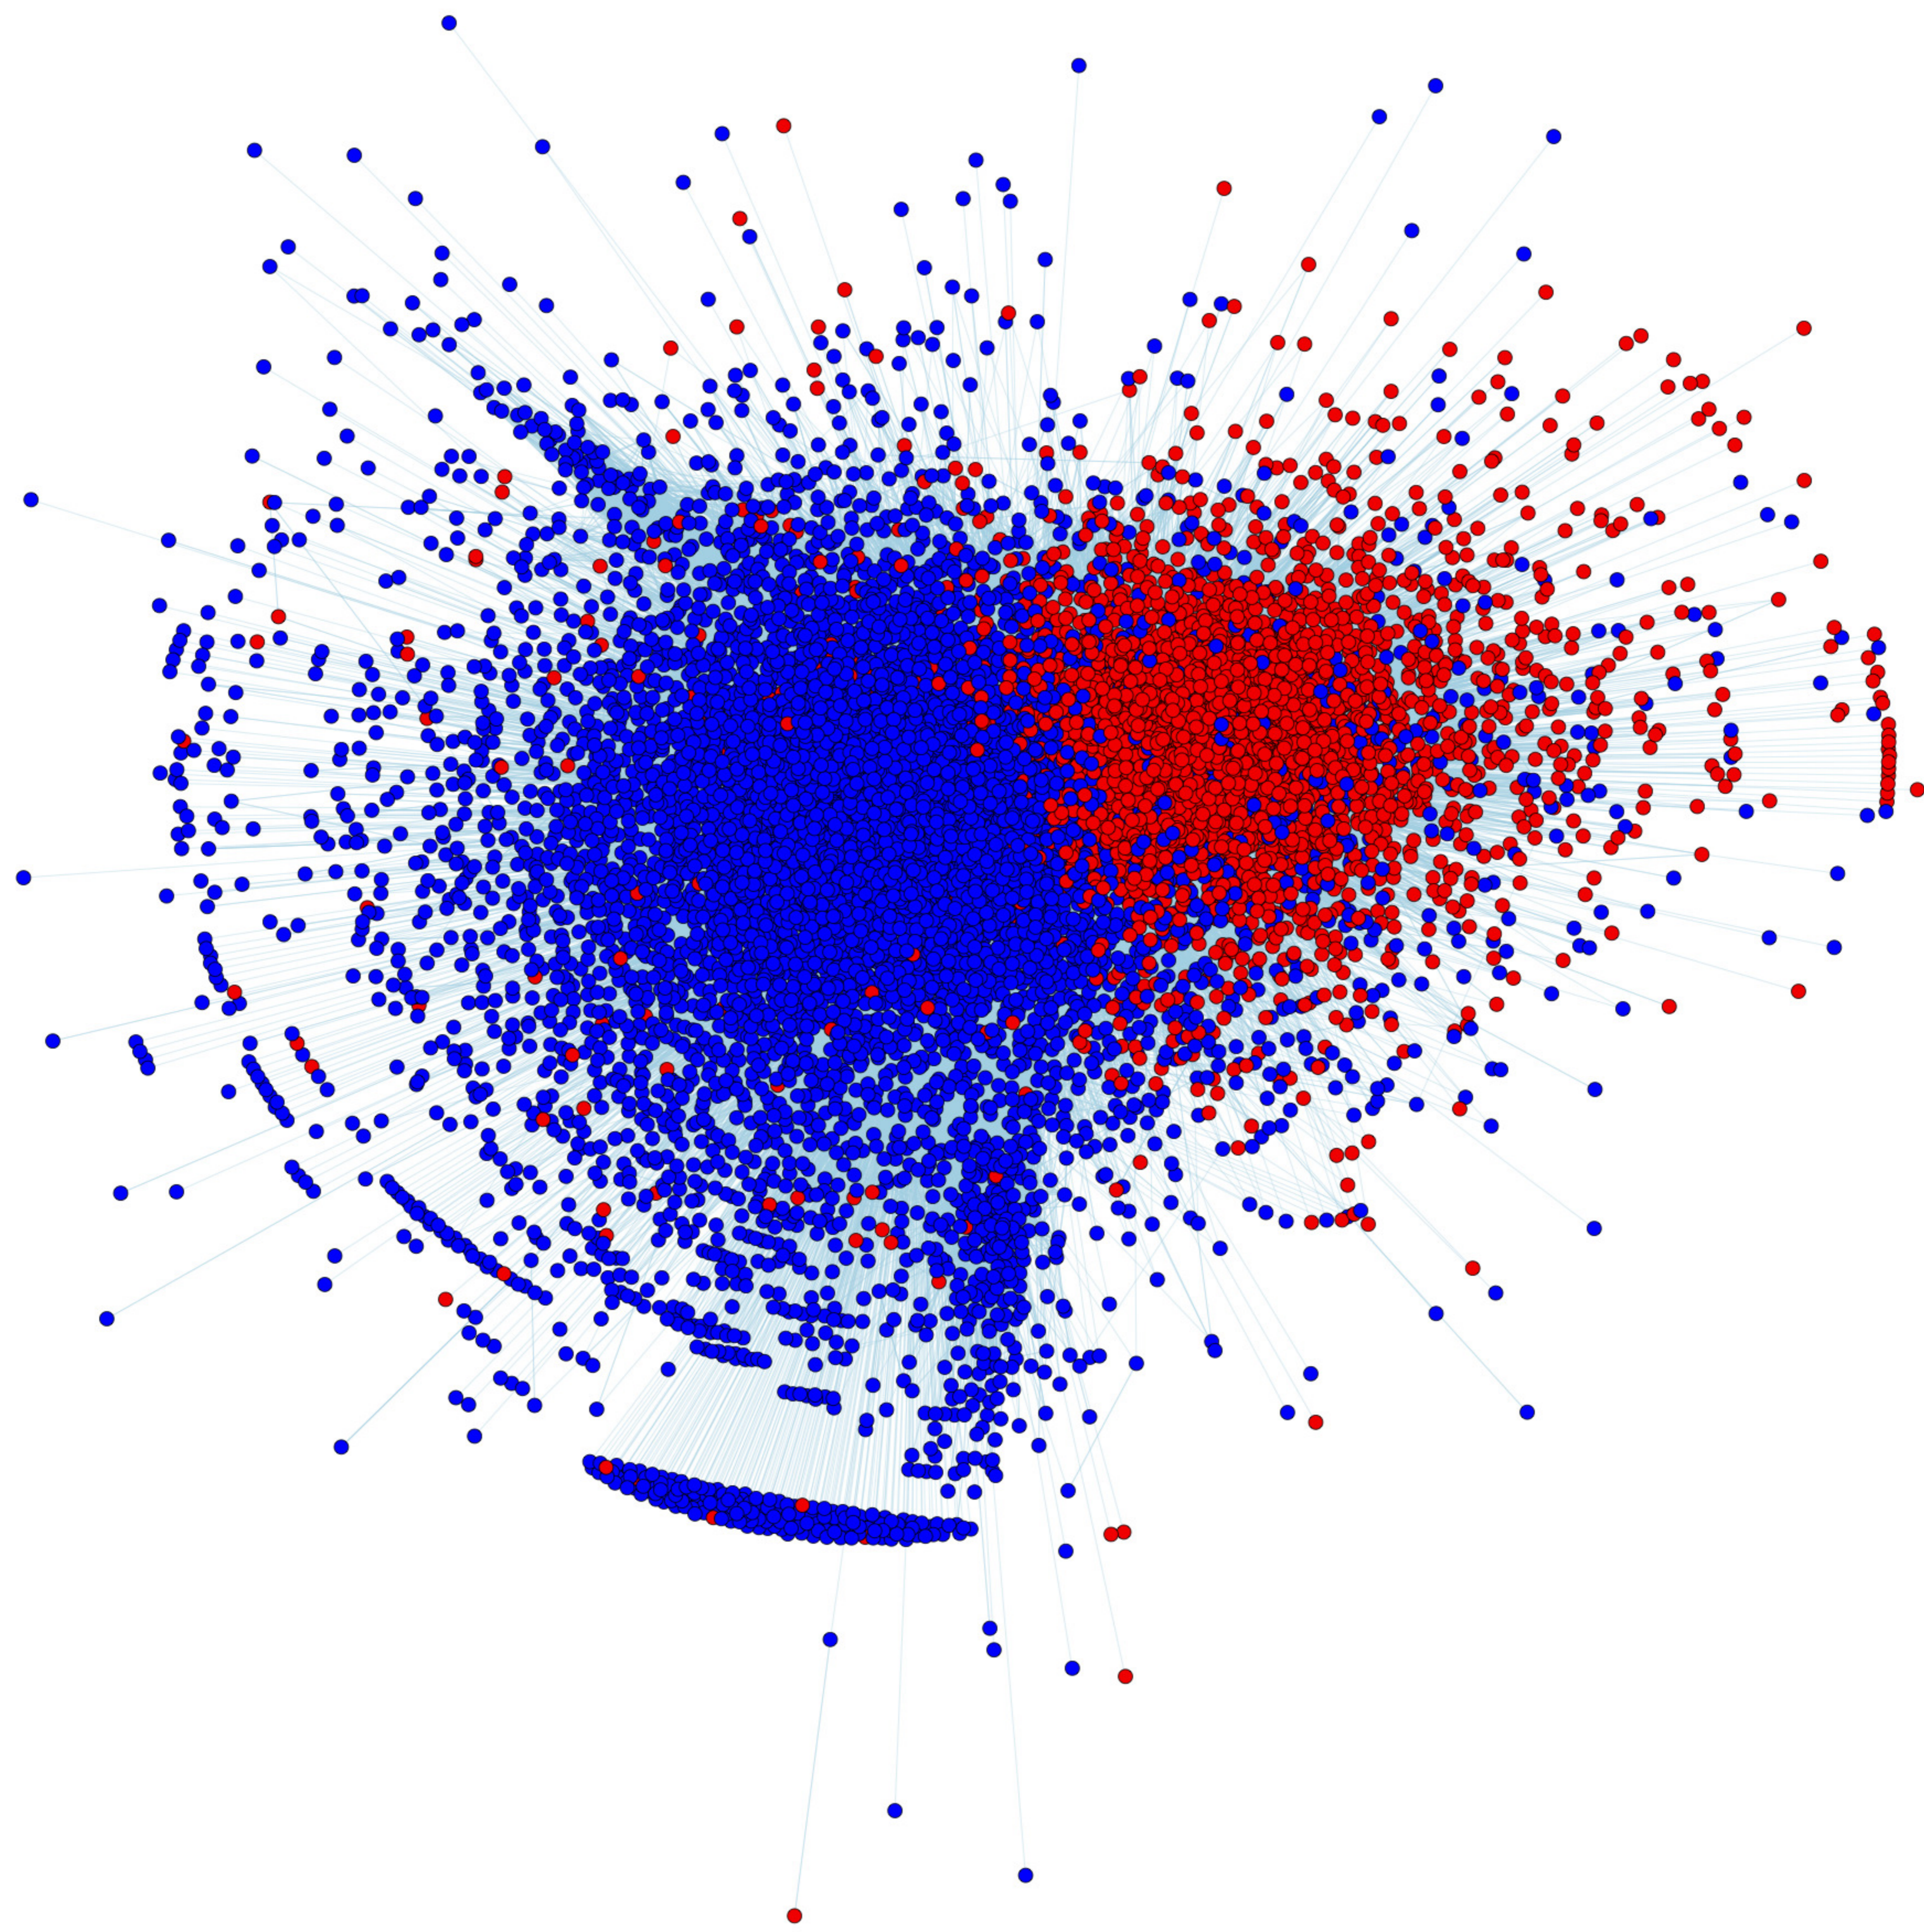

Supplement: MOESM5 [file 11893970]
